# Supplementary material
Source: HighWire-hosted journal article supplement (https://fn.bmj.com/content/106/3/286)
Supplement: inline-supplementary-material-1 [file inline-supplementary-material-1.pdf]

## Supplementary Material

### Duration of and Trends in Respiratory Support among Extremely Preterm Infants

Dany E Weisz MD MSc, Eugene Yoon MSc, Michael Dunn MD, Julie Emberley MD, Amit Mukerji MD MSc, Brooke Read RRT, Prakesh S Shah MD MSc on behalf of the Canadian Neonatal Network Investigators

## Table of Contents

**Table S1.** Method of Determination of the Duration of Respiratory Support and Event Status for Infants with Missing Data or Infants Who Died or Were Transferred Prior to Weaning from Respiratory Support

**Figure S2.** Flow Chart of Infants Included in and Excluded from the Study

**Table S3.** Antenatal and Perinatal Characteristics of Study Infants

**Figure S4.** Cumulative Incidence Plot: Time to First Successful Extubation

**Figure S5.** Cumulative Incidence Plot: Time to Weaning Off All Positive Pressure Support and Supplemental Oxygen

**Table S6.** Association of Year of Birth with the Hazard of Remaining on Respiratory Support during the Study Period (2010-2017)

**Table S7.** Numbers of Infants Who Died, Were Censored, or Were Successfully Extubated, According to Gestational Age

**Table S8.** Numbers of Infants Who Died, Were Censored, or Were Successfully Weaned Off Respiratory Support, According to Gestational Age

**Figure S9.** Annual Trends in the Percentages of Infants Treated with Systemic Corticosteroids for the Prevention of Bronchopulmonary Dysplasia

**Supplementary Table S1. Method of Determination of the Duration of Respiratory Support and Event Status for Infants with Missing Data or Infants Who Died or Were Transferred Prior to Weaning from Respiratory Support**

|                                                                  |                 | Outcome known for subsequent 7 days after respiratory support removed |                                                 | Outcome not known for subsequent 7 days after respiratory support removed (missing data) |                                             |                                                              |
|------------------------------------------------------------------|-----------------|-----------------------------------------------------------------------|-------------------------------------------------|------------------------------------------------------------------------------------------|---------------------------------------------|--------------------------------------------------------------|
|                                                                  |                 | Remains off respiratory support                                       | Re-administration of respiratory support        | Died within 7 days                                                                       | Transfer before 7 days to Level 2           | Transfer before 7 days to another Level 3 or out of province |
| Weaned from respiratory support                                  | <i>Duration</i> | Time until weaned off respiratory support                             | -                                               | Time until death                                                                         | Time until transfer                         | Time until transfer                                          |
|                                                                  | <i>Status</i>   | Successfully weaned off respiratory support                           | NOT successfully weaned off respiratory support | Died                                                                                     | Successfully weaned off respiratory support | Censored                                                     |
| Transferred or discharge home while still on respiratory support | <i>Duration</i> | Time until transfer                                                   |                                                 |                                                                                          |                                             |                                                              |
|                                                                  | <i>Status</i>   | Censored                                                              |                                                 |                                                                                          |                                             |                                                              |
| Died while still on respiratory support                          | <i>Duration</i> | Time until death                                                      |                                                 |                                                                                          |                                             |                                                              |
|                                                                  | <i>Status</i>   | Died                                                                  |                                                 |                                                                                          |                                             |                                                              |

This framework applies to all outcomes pertaining to duration of respiratory support, including first successful extubation, definitive extubation, weaning from all positive pressure ventilation (endotracheal and/or non-invasive), and weaning from all positive pressure ventilation and/or low flow oxygen.

**Supplementary Figure S2. Flow Chart of Infants Included in and Excluded from the Study**

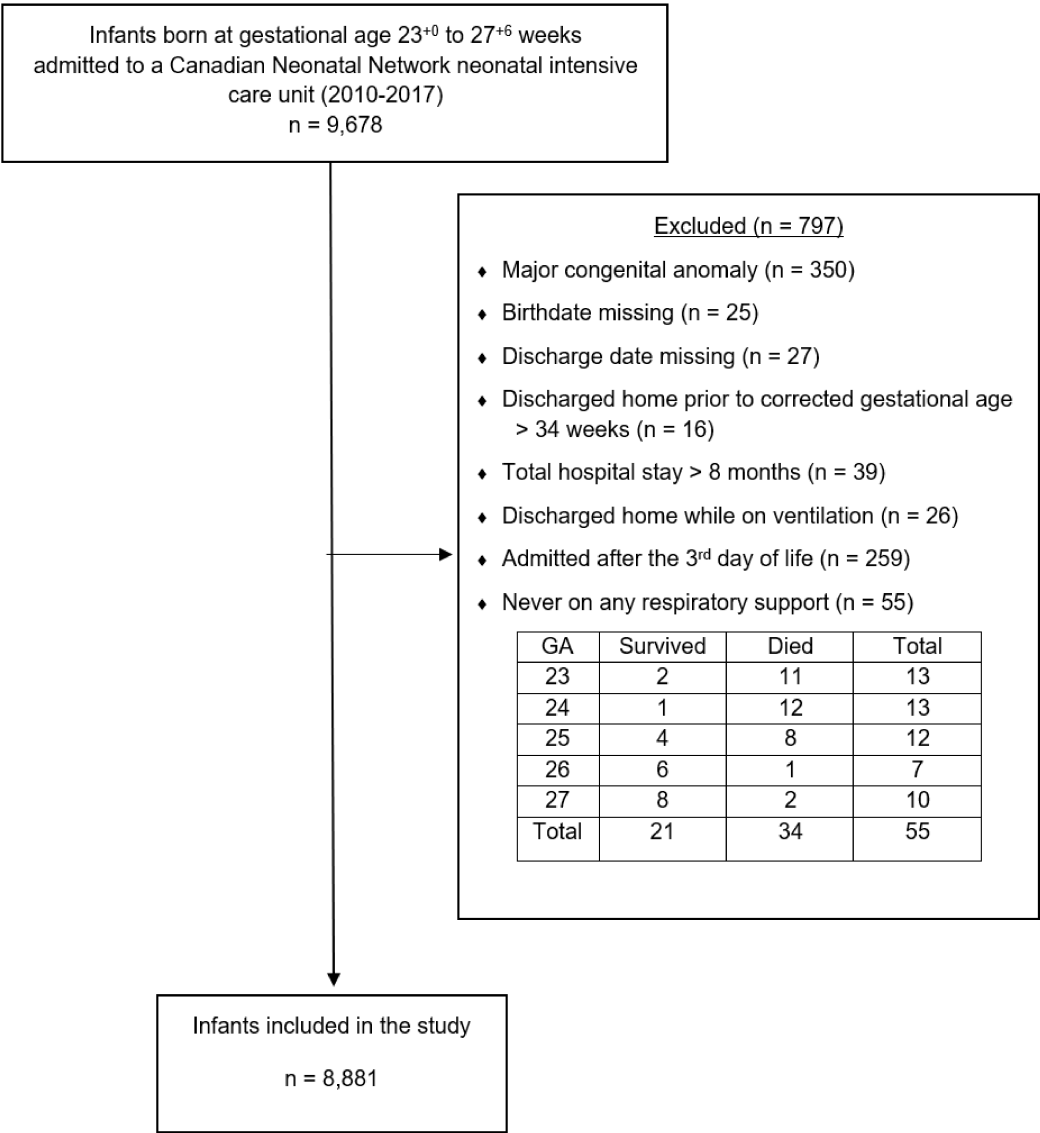

Abbreviation: GA, gestational age.

**Supplementary Table S3. Antenatal and Perinatal Characteristics of Study Infants**

|                                    |                         | <b>All (includes infants who received any form of positive pressure support)<br/>(n = 8,881)</b> | <b>Only infants who received endotracheal ventilation<br/>(n = 7,788)</b> |
|------------------------------------|-------------------------|--------------------------------------------------------------------------------------------------|---------------------------------------------------------------------------|
| GA at birth, No. (%)               | 23 weeks                | 638 (7%)                                                                                         | 636 (8%)                                                                  |
|                                    | 24 weeks                | 1432 (16%)                                                                                       | 1413 (18%)                                                                |
|                                    | 25 weeks                | 1959 (22%)                                                                                       | 1873 (24%)                                                                |
|                                    | 26 weeks                | 2251 (25%)                                                                                       | 1940 (25%)                                                                |
|                                    | 27 weeks                | 2601 (29%)                                                                                       | 1926 (25%)                                                                |
| Male, No. (%)                      |                         | 4745 (53%)                                                                                       | 4219 (54%)                                                                |
| Birth weight, mean (SD)            |                         | 846 (207)                                                                                        | 825 (202)                                                                 |
| Multiple births, No. (%)           |                         | 2212 (30%)                                                                                       | 1968 (25%)                                                                |
| Antenatal corticosteroids, No. (%) |                         | 7691 (88%)                                                                                       | 6647 (87%)                                                                |
| Outborn, No. (%)                   |                         | 1255 (14%)                                                                                       | 1193 (15%)                                                                |
| C-section, No. (%)                 |                         | 4970 (56%)                                                                                       | 4410 (57%)                                                                |
| Death, No. (%)                     | 23 weeks<br>GA at birth | 338 (53%)                                                                                        | 336 (53%)                                                                 |
|                                    | 24 weeks<br>GA at birth | 452 (32%)                                                                                        | 450 (32%)                                                                 |
|                                    | 25 weeks<br>GA at birth | 375 (19%)                                                                                        | 373 (20%)                                                                 |
|                                    | 26 weeks<br>GA at birth | 262 (12%)                                                                                        | 262 (14%)                                                                 |
|                                    | 27 weeks<br>GA at birth | 161 (6%)                                                                                         | 161 (8%)                                                                  |

Abbreviation: GA, gestational age.

**Supplementary Figure S4. Cumulative Incidence Plot: Time to First Successful Extubation**

First successful extubation was defined as 7 days without reintubation. Plot displays the percentages of infants over time who died before successful extubation (dark grey), were successfully extubated (intermediate grey), or continued to be treated with endotracheal ventilation without being successfully extubated (light grey). A total of 7,788 infants were treated with endotracheal ventilation and were included in the analysis.

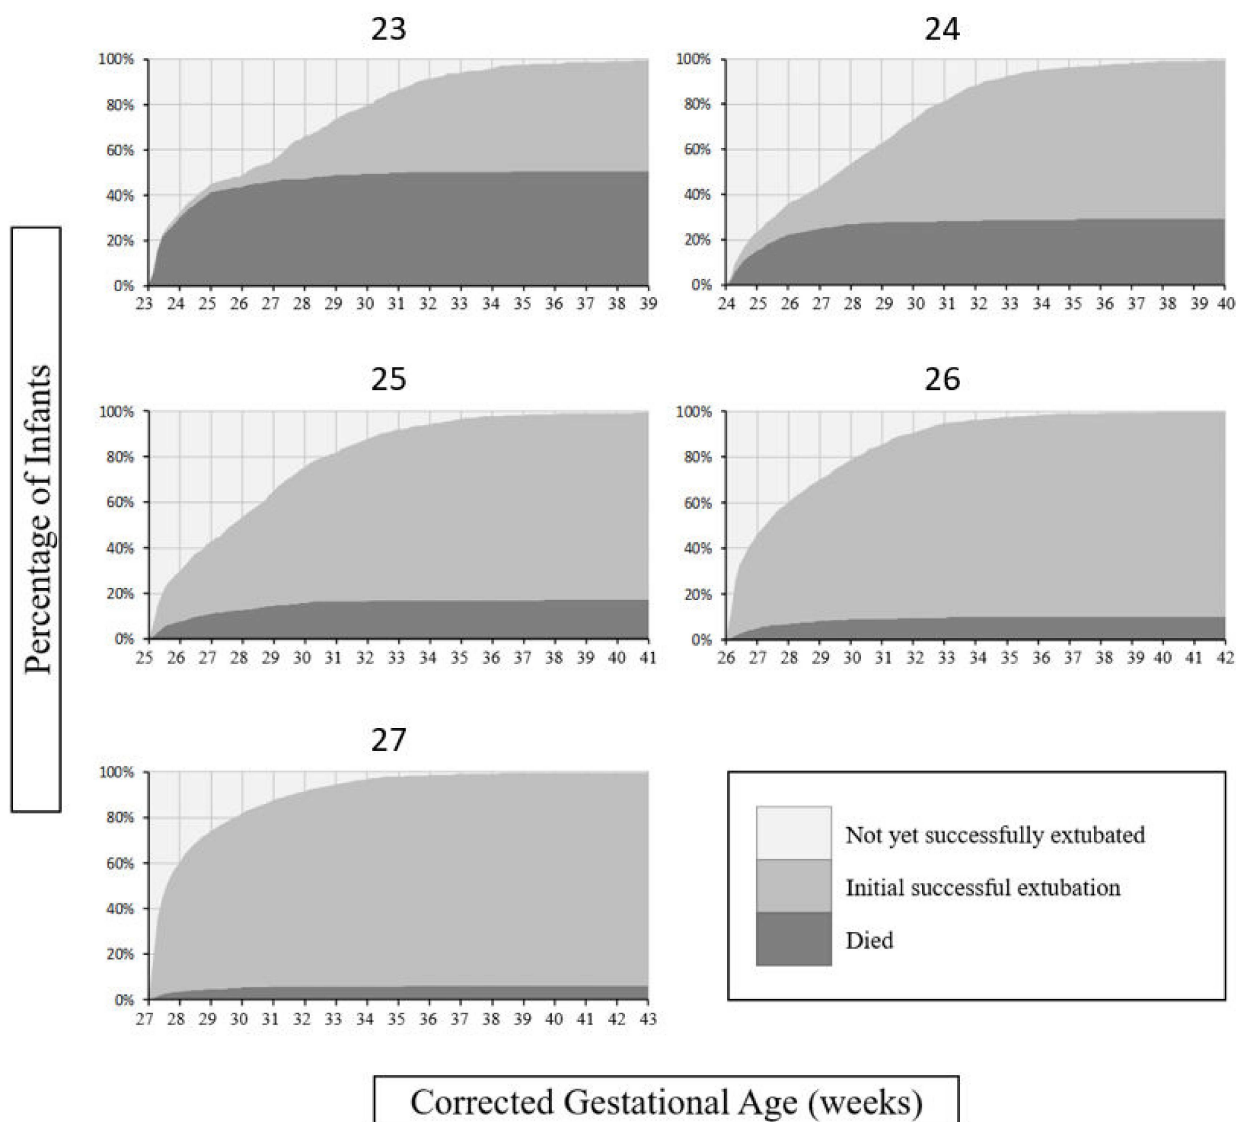

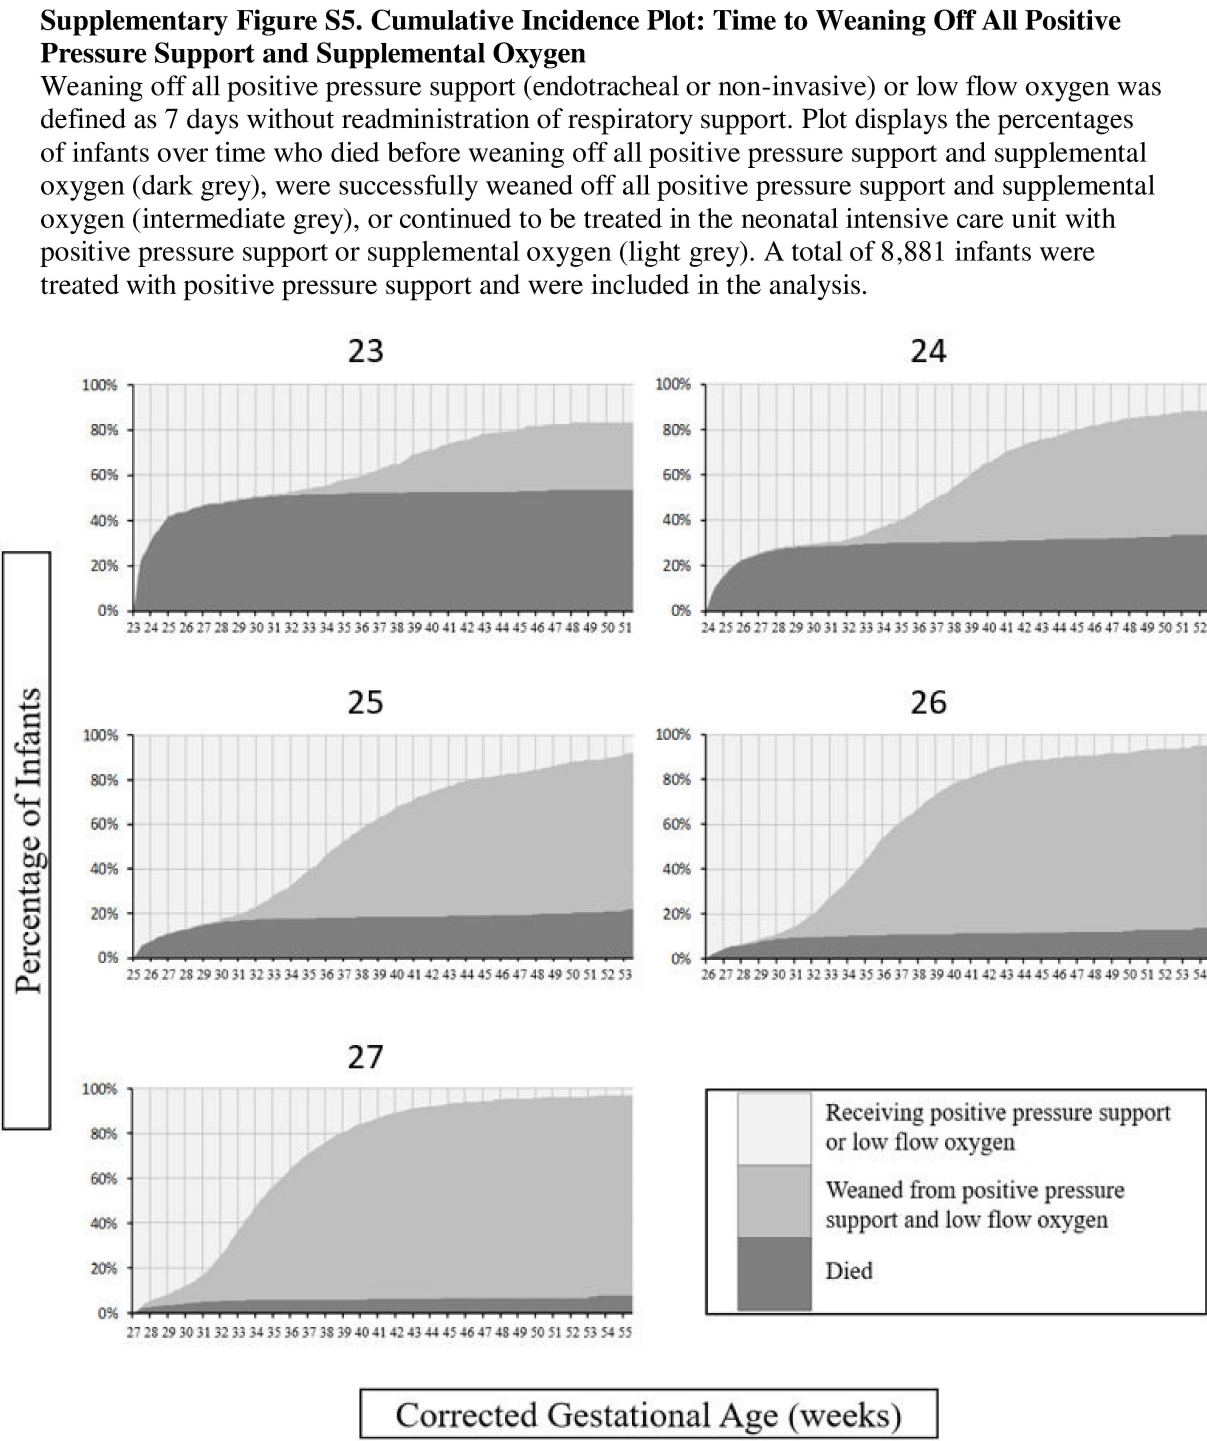

**Supplementary Table S6. Association of Year of Birth with the Hazard of Remaining on Respiratory Support and the Odds of Survival during the Study Period (2010-2017)**

| GA at birth, weeks | Initial successful extubation, hazard ratio (95% CI) | Definitive extubation, hazard ratio (95% CI) | Off positive pressure support, hazard ratio (95% CI) | Survival, odds ratio (95% CI) |
|--------------------|------------------------------------------------------|----------------------------------------------|------------------------------------------------------|-------------------------------|
| 23                 | 1.06 (1.01, 1.11)                                    | 1.06 (1.01, 1.11)                            | 1.06 (1.01, 1.11)                                    | 1.11 (1.03, 1.18)             |
| 24                 | 1.05 (1.03, 1.08)                                    | 1.05 (1.02, 1.08)                            | 1.02 (0.99, 1.05)                                    | 1.09 (1.03, 1.14)             |
| 25                 | 1.02 (0.99, 1.04)                                    | 1.02 (1.00, 1.04)                            | 0.98 (0.96, 1.01)                                    | 1.04 (0.99, 1.10)             |
| 26                 | 0.99 (0.97, 1.01)                                    | 1.01 (0.99, 1.03)                            | 0.97 (0.95, 0.98)                                    | 1.04 (0.98, 1.10)             |
| 27                 | 0.99 (0.98, 1.01)                                    | 1.01 (0.99, 1.03)                            | 0.97 (0.95, 0.99)                                    | 1.05 (0.99, 1.14)             |

CI, confidence interval; GA gestational age.

**Supplementary Table S7. Numbers of Infants Who Died, Were Censored, or Were Successfully Extubated, According to Gestational Age**

| GA at Birth, Weeks (No.) | Never Treated with ETTV, No. (%) | First Successful Extubation          |                                                                                 |                   | Definitive Extubation          |                                                                           |                   |
|--------------------------|----------------------------------|--------------------------------------|---------------------------------------------------------------------------------|-------------------|--------------------------------|---------------------------------------------------------------------------|-------------------|
|                          |                                  | First Successful Extubation, No. (%) | Death While on ETTV or Within 7 Days After First Successful Extubation, No. (%) | Censored, No. (%) | Definitive Extubation, No. (%) | Death While on ETTV or Within 7 Days After Definitive Extubation, No. (%) | Censored, No. (%) |
| 23 (n=638)               | 2 (0.3%)                         | 304 (47.6%)                          | 320 (50.2%)                                                                     | 12 (1.9%)         | 287 (45.0%)                    | 332 (52.0%)                                                               | 17 (2.7%)         |
| 24 (n=1432)              | 19 (1.3%)                        | 987 (68.9%)                          | 415 (29.0%)                                                                     | 11 (0.8%)         | 959 (67.0%)                    | 442 (30.9%)                                                               | 12 (0.8%)         |
| 25 (n=1959)              | 86 (4.4%)                        | 1529 (78.1%)                         | 324 (16.5%)                                                                     | 20 (1.0%)         | 1468 (74.9%)                   | 365 (18.6%)                                                               | 40 (2.0%)         |
| 26 (n=2251)              | 311 (13.8%)                      | 1731 (76.9%)                         | 197 (8.8%)                                                                      | 12 (0.5%)         | 1673 (74.3%)                   | 242 (10.8%)                                                               | 25 (1.1%)         |
| 27 (n=2601)              | 675 (26.0%)                      | 1797 (69.1%)                         | 120 (4.6%)                                                                      | 9 (0.3%)          | 1752 (67.4%)                   | 153 (5.9%)                                                                | 21 (0.8%)         |
| Total (n=8881)           | 1093 (12.3%)                     | 6348 (71.5%)                         | 1376 (15.5%)                                                                    | 64 (0.7%)         | 6139 (69.1%)                   | 1534 (17.3%)                                                              | 115 (1.3%)        |

ETTV, endotracheal ventilation; GA, gestational age



**Supplementary Table S8. Numbers of Infants Who Died, Were Censored, or Were Successfully Weaned Off Respiratory Support, According to Gestational Age**

| GA at Birth, Weeks (No.) | Weaning Off All PPV (Invasive and Non-invasive) |                                                                |                   | Weaning Off All Respiratory Support (Invasive and Non-Invasive PPV and LFO <sub>2</sub> ) |                                                                                       |                   |
|--------------------------|-------------------------------------------------|----------------------------------------------------------------|-------------------|-------------------------------------------------------------------------------------------|---------------------------------------------------------------------------------------|-------------------|
|                          | Weaned Off All PPV, No. (%)                     | Death While on PPV or Within 7 Days After Weaning Off, No. (%) | Censored, No. (%) | Weaned Off All PPV and LFO <sub>2</sub> , No. (%)                                         | Death While on [PPV or LFO <sub>2</sub> ] or Within 7 Days After Weaning Off, No. (%) | Censored, No. (%) |
| 23 (n=638)               | 262 (41.1%)                                     | 336 (52.7%)                                                    | 40 (6.3%)         | 142 (22.3%)                                                                               | 336 (52.7%)                                                                           | 160 (25.1%)       |
| 24 (n=1432)              | 909 (63.5%)                                     | 452 (31.6%)                                                    | 71 (5.0%)         | 590 (41.2%)                                                                               | 452 (31.6%)                                                                           | 390 (27.2%)       |
| 25 (n=1959)              | 1416 (72.3%)                                    | 377 (19.2%)                                                    | 166 (8.5%)        | 1021 (52.1%)                                                                              | 377 (19.2%)                                                                           | 561 (28.6%)       |
| 26 (n=2251)              | 1804 (80.1%)                                    | 257 (11.4%)                                                    | 190 (8.4%)        | 1407 (62.5%)                                                                              | 257 (11.4%)                                                                           | 587 (26.1%)       |
| 27 (n=2601)              | 2190 (84.2%)                                    | 161 (6.2%)                                                     | 250 (9.6%)        | 1855 (71.3%)                                                                              | 162 (6.2%)                                                                            | 584 (22.5%)       |
| Total (n=8881)           | 6581 (74.1%)                                    | 1583 (17.8%)                                                   | 717 (8.1%)        | 5015 (56.5%)                                                                              | 1584 (17.8%)                                                                          | 2282 (25.7%)      |

GA, gestational age; LFO<sub>2</sub>, low flow oxygen; PPV, positive pressure ventilation

**Supplementary Figure S9. Annual Trends in the Percentages of Infants Treated with Systemic Corticosteroids for the Prevention of Bronchopulmonary Dysplasia, According to Gestational Age**

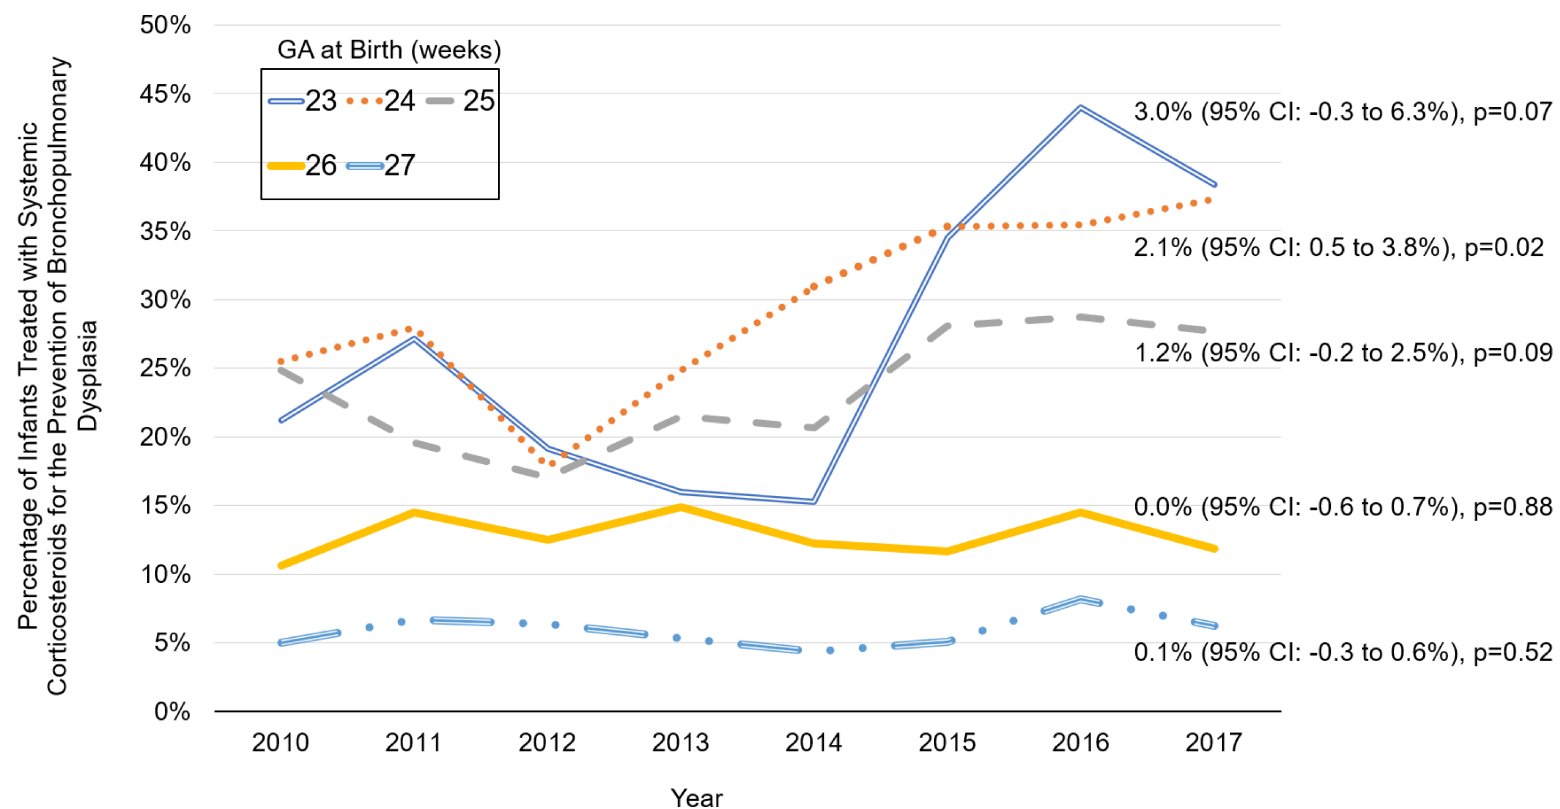

Trend presented as year-over-year percentage change with 95% confidence interval.

Abbreviations: CI, confidence interval; GA, gestational age
